# Supplementary material for: An interpretable multiparametric radiomics model of basal ganglia to predict dementia conversion in Parkinson’s disease
Source: PubMed Central journal article supplement (PMC10468504; doi:10.1038/s41531-023-00566-1), 2023-08-30
Supplement: 41531_2023_566_MOESM1_ESM.pdf [file 41531_2023_566_MOESM1_ESM.pdf]

## Supplementary Information

**Supplementary Table 1.** Logistic regression analysis for dementia within 5 years of PD diagnosis

|                            | Beta (SE)      | p-value | VIF   |
|----------------------------|----------------|---------|-------|
| Overall series             |                |         |       |
| Age                        | 0.083 (0.023)  | <0.001  | 1.127 |
| Disease duration           | 0.008 (0.010)  | 0.423   | 1.008 |
| Visual memory/visuospatial | -0.662 (0.179) | <0.001  | 1.063 |
| Verbal memory              | -0.585 (0.166) | <0.001  | 1.024 |
| Frontal/executive          | -1.111 (0.200) | <0.001  | 1.113 |

VIF = variance inflation factor

**Supplementary Table 2.** The results of correlation analysis among features

1) Correlation between the selected radiomic features and clinical features

|             |                         | 10 Percentile from the more-affected side of the caudate | Gray Level Non-Uniformity from the more-affected caudate | Gray Level Non-Uniformity Normalized from the less-affected side of the caudate |
|-------------|-------------------------|----------------------------------------------------------|----------------------------------------------------------|---------------------------------------------------------------------------------|
| age         | correlation coefficient | -.095                                                    | -.462                                                    | .066                                                                            |
|             | P value                 | .124                                                     | .000                                                     | .290                                                                            |
| PD duration | correlation coefficient | -.069                                                    | .023                                                     | -.006                                                                           |
|             | P value                 | .265                                                     | .705                                                     | .921                                                                            |
| factor1     | correlation coefficient | -.026                                                    | .058                                                     | -.067                                                                           |
|             | P value                 | .680                                                     | .347                                                     | .281                                                                            |
| factor2     | correlation coefficient | .164                                                     | .060                                                     | .147                                                                            |
|             | P value                 | .008                                                     | .335                                                     | .017                                                                            |
| factor3     | correlation coefficient | .083                                                     | .266                                                     | .118                                                                            |
|             | P value                 | .182                                                     | .000                                                     | .056                                                                            |

As there were 15 pairs of comparisons, the Bonferroni correction was applied, and the p-value for determining significance was adjusted to  $0.05/15 = 0.0033$ . Therefore, the only statistically meaningful relations were found between the two pairs:

- 1) Age and Gray Level Non-Uniformity from the more-affected caudate
- 2) Factor 3 and Gray Level Non-Uniformity from the more-affected caudate

2) Variance inflation factor (VIF) for each feature included in the combined model

| Variables                                                                       | VIF   |
|---------------------------------------------------------------------------------|-------|
| age                                                                             | 1.374 |
| PD duration                                                                     | 1.018 |
| factor1                                                                         | 1.056 |
| factor2                                                                         | 1.065 |
| factor3                                                                         | 1.149 |
| 10 Percentile from the more-affected side of the caudate                        | 1.110 |
| Gray Level Non-Uniformity from the more-affected caudate                        | 1.350 |
| Gray Level Non-Uniformity Normalized from the less-affected side of the caudate | 1.092 |

As all the VIFs were under 5, we concluded that there were no significant correlations that require attention.

3) Pearson correlation analysis between the selected radiomic features and the volume of region of interests

|                                                                                 |                         | Contralateral caudate volume | Ipsilateral caudate volume | Contralateral putamen volume | Ipsilateral putamen volume |
|---------------------------------------------------------------------------------|-------------------------|------------------------------|----------------------------|------------------------------|----------------------------|
| 10 Percentile from the more-affected side of the caudate                        | Correlation coefficient | .065                         | .034                       | .012                         | .072                       |
|                                                                                 | P value                 | .294                         | .579                       | .848                         | .247                       |
| Gray Level Non-Uniformity from the more-affected caudate                        | Correlation coefficient | -.079                        | -.047                      | -.014                        | .051                       |
|                                                                                 | P value                 | .200                         | .450                       | .815                         | .408                       |
| Gray Level Non-Uniformity Normalized from the less-affected side of the caudate | Correlation coefficient | .021                         | -.010                      | -.041                        | -.044                      |
|                                                                                 | P value                 | .734                         | .875                       | .511                         | .474                       |

As the radiomic feature was extracted from ipsilateral/contralateral and caudate/putamen, respectively, the ROI volume was divided into four categories, as described in the Table above. As there were 12 pairs of comparisons, the Bonferroni correction was applied, and the p-value for determining significance was adjusted to  $0.05/12 = 0.0042$ . There were no statistically significant association between the ROI volumes and selected radiomic feature values.
